# Supplementary material for: Hepatokine α1-Microglobulin Signaling Exacerbates Inflammation and Disturbs Fibrotic Repair in Mouse Myocardial Infarction
Source: PubMed Central journal article supplement (PMC6233179; doi:10.1038/s41598-018-35194-w), 2018-11-13

Supplementary Information

**Hepatokine  $\alpha$ 1-Microglobulin Signaling Exacerbates Inflammation  
and Disturbs Fibrotic Repair in Mouse Myocardial Infarction**

Daihiko Hakuno<sup>1\*</sup>, Masahiro Kimura<sup>1</sup>, Shinji Ito<sup>2</sup>, Junko Satoh<sup>2</sup>, Yasuhiro Nakashima<sup>1</sup>,  
Takahiro Horie<sup>1</sup>, Yasuhide Kuwabara<sup>1</sup>, Masataka Nishiga<sup>1</sup>, Yuya Ide<sup>1</sup>, Osamu Baba<sup>1</sup>, Hitoo  
Nishi<sup>1</sup>, Tetsushi Nakao<sup>1</sup>, Tomohiro Nishino<sup>1</sup>, Fumiko Nakazeki<sup>1</sup>, Satoshi Koyama<sup>1</sup>, Ritsuko  
Hanada<sup>1</sup>, Ruiz R. Randolph<sup>1</sup>, Jin Endo<sup>3</sup>, Takeshi Kimura<sup>1</sup>, Koh Ono<sup>1</sup>

**Author Affiliations:**

<sup>1</sup> Department of Cardiovascular Medicine, Graduate School of Medicine, Kyoto University, 54  
Kawaharacho, Shogoin, Sakyo-ku, Kyoto, 606-8507, Japan.

<sup>2</sup> Medical Research Support Center, Graduate School of Medicine, Kyoto University, 54  
Kawaharacho, Shogoin, Sakyo-ku, Kyoto, 606-8507, Japan

<sup>3</sup> Cardiovascular Division, Department of Internal Medicine, Keio University School of  
Medicine, 35 Shinanomachi, Shinjuku-ku, Tokyo, Japan.

**Supplementary Table S1. Raw data with peptide mass fingerprinting of fraction 3 in gel**

| <b>filtration</b> |                                               |        |         |                          |
|-------------------|-----------------------------------------------|--------|---------|--------------------------|
| Accession number  | Protein name                                  | Score* | Expect  | Number of masses matched |
| gi 4502067        | AMBP                                          | 112    | 1.6e-06 | 10                       |
| gi 223373         | complex-forming glycoprotein HC               | 96     | 5.5e-05 | 8                        |
|                   | Chain A, Crystal Structure of                 | 94     | 9.4e-05 | 8                        |
| gi 374977533      | alpha-1-microglobulin                         |        |         |                          |
| gi 119584203      | fibrinogen-like 1, isoform CRA_a              | 46     | 6.4     | 4                        |
| gi 146330428      | immunoglobulin heavy chain<br>variable region | 42     | 15      | 3                        |
| gi 119584206      | fibrinogen-like 1, isoform CRA_d              | 42     | 16      | 4                        |
| gi 119611487      | hCG2039058                                    | 40     | 23      | 3                        |
| gi 67515417       | fibrinogen-like 1                             | 38     | 35      | 4                        |
| gi 16444966       | HP-041                                        | 38     | 35      | 4                        |
| gi 22023090       | LFIRE1                                        | 38     | 35      | 4                        |
| gi 42544189       | fibrinogen-like protein 1 precursor           | 38     | 35      | 4                        |
| gi 211830458      | TP53BP2                                       | 37     | 48      | 6                        |

\*Protein scores greater than 66 are significant ( $p < 0.05$ ).

For AMBP, protein sequence coverage: 39%, number of masses searched/matched: 19/10

Matched peptides are shown in red in AMBP protein sequence.

1 M RSLGALLLL LSACLAVSAG PVPTPPDNIQ VQENFNISRI YGKWYNLAIG  
51 STCPWLKKIM DRMTVSTLVL GEGATEAEIS MTSTRWRKGV CEETSGAYEK  
101 TDTDGKFLYH KSKWNITMES YVVHTNYDEY AIFLTKKFSR HHGPTITAKL  
151 YGRAPQLRET LLQDFRVVAQ GVGIPEDSIF TMADRGECPV GEQEPEPILI  
201 PRVRAVLQP EEGSGGGQL VTEVTKKEDS CQLGYSAGPC MGMTSRYFYFN  
251 GTSMACETFQ YGGCMGNGNN FVTEKECLQT CRTVAACNLP IVRGPCRAFI  
301 QLWAFDAVKG KCVLFPYGGC QGNGNKFYSE KECREYCGVP GDGDEELLRF  
351 SN

**Supplementary Table S2. Clinical characteristics of human control subjects and acute MI patients in this study**

|                                  | control (n = 33) | acute MI (n = 37) | p value |
|----------------------------------|------------------|-------------------|---------|
| age                              | 56.0 ± 12.9      | 61.7 ± 12.0       | 0.06    |
| sex (% male)                     | 82               | 89                | 0.39    |
| BMI                              | 23.7 ± 3.1       | 25.9 ± 3.9        | 0.02    |
| estimated GFR                    | 73.8 ± 6.8       | 81.8 ± 14.1       | 0.02    |
| diabetes mellitus (%)            | 3.0              | 32.4              | 0.001   |
| hypertension (%)                 | 24.2             | 51.4              | 0.02    |
| infarcted branch (RCA: LAD: LCX) |                  | 19: 14: 4         |         |

BMI, body mass index; GFR, glomerular filtration ratio; RCA, right coronary artery; LAD; left anterior descending coronary artery; LCX, left circumflex coronary artery. The measurements are presented as mean ± standard deviation.

**Supplementary Table S3. Shotgun proteomic analysis of stimulated primary rat CFBs**

| Max fold change | Normalized abundance |           | Genes                                | Accession number |
|-----------------|----------------------|-----------|--------------------------------------|------------------|
|                 | AM                   | PBS       |                                      |                  |
| 83.47           | 250035.99            | 2995.43   | Alpha-actinin-4                      | sp Q9QXQ0 ACTN4  |
| 50.73           | 5902.07              | 116.34    | Annexin A2                           | sp Q07936 ANXA2  |
| 24.30           | 17014.20             | 700.24    | Heat shock cognate<br>71 kDa protein | sp P63018 HSP7C  |
| 8.45            | 2848.19              | 337.02    | Glial fibrillary acidic<br>protein   | sp P47819 GFAP   |
| 3.45            | 110360.26            | 32005.78  | Vimentin                             | sp P31000 VIME   |
| 3.12            | 31986.74             | 10267.54  | Myosin-9                             | sp Q62812 MYH9   |
| 2.46            | 14994.00             | 6085.56   | Myosin-10                            | sp Q9JLT0 MYH10  |
| 1.76            | 3711.49              | 2109.96   | Tubulin beta-5 chain                 | sp P69897 TBB5   |
| 1.52            | 36513.90             | 23946.72  | Ig gamma-2C chain<br>C region        | sp P20762 IGG2C  |
| 1.35            | 6017.92              | 4472.67   | 78 kDa glucose-<br>regulated protein | sp P06761 GRP78  |
| 1.25            | 2902.98              | 2328.77   | Alpha-actinin-1                      | sp Q9Z1P2 ACTN1  |
| 1.20            | 25842.57             | 21557.68  | Actin, aortic smooth<br>muscle       | sp P62738 ACTA   |
| 1.13            | 184196.83            | 163446.59 | Ig gamma-2B chain<br>C region        | sp P20761 IGG2B  |

Proteins identified by at least 2 distinct peptides having at least 95% confidence are shown.

**Supplementary Table S4. PCR primer sequences used in this study**

| Species                               | Gene                          |                      | Sequence                  |
|---------------------------------------|-------------------------------|----------------------|---------------------------|
| Mouse                                 | <i>AM</i>                     | (F)                  | GAAACAGAGATCAGCATGACCAGTA |
|                                       |                               | (R)                  | CATTTGGATTTGTGGTAGAGGAACT |
|                                       | <i>ICAM-1</i>                 | (F)                  | TCACCAGGAATGTGTACCTGAC    |
|                                       |                               | (R)                  | GGCTTGTCCCTTGAGTTTTATG    |
|                                       | <i>VCAM-1</i>                 | (F)                  | TGACAAGTCCCCATCGTTGA      |
|                                       |                               | (R)                  | ACCTCGCGACGGCATAATT       |
|                                       | <i>L-selectin</i>             | (F)                  | ACCCACTCTCTTGGAGCTGA      |
|                                       |                               | (R)                  | CAGGTTGGGCAAGTTAAGGA      |
|                                       | <i>iNOS</i>                   | (F)                  | GAGTCTTGGTGAAAGTGGTGTTTC  |
|                                       |                               | (R)                  | TTCCCTGTCTCAGTAGCAAAGAG   |
|                                       | <i>IL-6</i>                   | (F)                  | ACCACGGCCTTCCCTACTTC      |
|                                       |                               | (R)                  | AGATTGTTTTCTGCAAGTGCATCA  |
|                                       | <i>TNF<math>\alpha</math></i> | (F)                  | CCAGACCCTCACACTCAGATC     |
|                                       |                               | (R)                  | CACTTGGTGGTTTGCTACGAC     |
|                                       | <i>IL-1<math>\beta</math></i> | (F)                  | GCTGCTTCCAAACCTTTGAC      |
|                                       |                               | (R)                  | TTCTCCACAGCCACAATGAG      |
|                                       | <i>IFN<math>\gamma</math></i> | (F)                  | GCTGACCTAGAGAAGACACATCAG  |
|                                       |                               | (R)                  | GTGTGTAGCGTTCATTGTCTCAG   |
|                                       | <i>IL-23a</i>                 | (F)                  | GACTCAGCCAACCTCCTCCAG     |
|                                       |                               | (R)                  | GGCACTAAGGGCTCAGTCAG      |
| <i><math>\alpha_2</math> integrin</i> | (F)                           | CCGGGTGCTACAAAAGTCAT |                           |
|                                       | (R)                           | GTCGGCCACATTGAAAAAGT |                           |
| <i><math>\alpha_4</math> integrin</i> | (F)                           | CCCAGGCTACATCGTTTTGT |                           |
|                                       | (R)                           | CATGAATGGGGGTAAGGATG |                           |
| <i><math>\alpha_5</math> integrin</i> | (F)                           | AGCGACTGGAATCCTCAAGA |                           |
|                                       | (R)                           | TGCTGAGTCCTGTCACCTTG |                           |
| <i><math>\alpha_6</math> integrin</i> | (F)                           | AGCCCAGGGACTTACAACCT |                           |
|                                       | (R)                           | CTCTTGGAGCACCAGACACA |                           |
| <i><math>\alpha_M</math> integrin</i> | (F)                           | GACTCAGTGAGCCCCATCAT |                           |
|                                       | (R)                           | AGATCGTCTTGGCAGATGCT |                           |
| <i><math>\alpha_L</math> integrin</i> | (F)                           | CTGTTCTTTGGGGAGCAGAG |                           |
|                                       | (R)                           | CAGCCACATCAGTCAGCCTA |                           |
| <i><math>\alpha_V</math> integrin</i> | (F)                           | GGGTGATCATCTTGGCAGTT |                           |
|                                       | (R)                           | GAACTTGGAGCGGACAGAAG |                           |
| <i><math>\beta_1</math> integrin</i>  | (F)                           | GCCAGGGCTGGTTATACAGA |                           |
|                                       | (R)                           | TCACAATGGCACACAGGTTT |                           |
| <i><math>\beta_2</math> integrin</i>  | (F)                           | TGCCCTAGCTGGACTGTTCT |                           |
|                                       | (R)                           | TGATATCATCGGCTGGACAA |                           |
| <i><math>\beta_3</math> integrin</i>  | (F)                           | TGTATCGTCTGTGCCTCTGC |                           |

|                    |     |                        |
|--------------------|-----|------------------------|
|                    | (R) | TTGCCATCCTCACCCCTTAAC  |
| <i>β5 integrin</i> | (F) | GGTTTCGGGTCTTTTGTTGA   |
|                    | (R) | GCTTCCTCACTTCCTCGTTG   |
| <i>CCR2</i>        | (F) | TCAGTTCATCCACGGCATAAC  |
|                    | (R) | TGACAAGGCTCACCATCATC   |
| <i>CCR5</i>        | (F) | CGAAAACACATGGTCAAACG   |
|                    | (R) | TTCCTACTCCCAAGCTGCAT   |
| <i>CX3CR1</i>      | (F) | TTGGAACCATCTTCCTGTCC   |
|                    | (R) | ACCAACAGATTTCCCACCAG   |
| <i>Arginase1</i>   | (F) | AACTCTTGGGAAGACAGCAGAG |
|                    | (R) | GTAGTCAGTCCCTGGCTTATGG |
| <i>IL-10</i>       | (F) | AAATAAGAGCAAGGCAGTGGAG |
|                    | (R) | TCATTCATGGCCTTGTAGACAC |
| <i>Fizz</i>        | (F) | AGGATGCCAACTTTGAATAGGA |
|                    | (R) | AGTTAGCTGGATTGGCAAGAAG |
| <i>Mrc1</i>        | (F) | ATTCCGGTATCTGAACTGGCTA |
|                    | (R) | TGAGGGAATGATAAATGGGTTT |
| <i>MMP9</i>        | (F) | TCACACGACATCTTCCAGTACC |
|                    | (R) | CACCTCATTGGAAGTCAACA   |
| <i>β-actin</i>     | (F) | AGATTACTGCTCTGGCTCCTA  |
|                    | (R) | CAAAGAAAGGGTGTAAAACG   |
| <i>GAPDH</i>       | (F) | AAATGGTGAAGGTCGGTGTG   |
|                    | (R) | AATCTCCACTTTGCCACTGC   |
| Rat                |     |                        |
| <i>CCL2</i>        | (F) | ATGCAGTTAATGCCCACTC    |
|                    | (R) | TTCCTTATTGGGGTCAGCAC   |
| <i>IL-6</i>        | (F) | ATGTTGTTGACAGCCACTGC   |
|                    | (R) | TAAGCCTCCGACTTGTGAAG   |
| <i>TNFα</i>        | (F) | ACGATGCTCAGAAACACACG   |
|                    | (R) | ATCCAGTGAGTTCCGAAAGC   |
| <i>IL-1β</i>       | (F) | TGAAGCAGCTATGGCAACTG   |
|                    | (R) | ATCTTTTGGGGTCTGTCAGC   |
| <i>αSMA</i>        | (F) | AGGGAGTGATGGTTGGAATG   |
|                    | (R) | GCCAGATCTTTCCATGTCCG   |
| <i>PDGFRα</i>      | (F) | TGGAAGGCGCAGAAGCAATA   |
|                    | (R) | TGCAAACGCGTGGTAAACAG   |
| <i>Col 1a1</i>     | (F) | TGGTCCTCAAGGTTTCCAAG   |
|                    | (R) | TTACCAGCTTCCCCATCATC   |
| <i>Col 3a1</i>     | (F) | AGCTGGACCAAAAAGGTGATG  |
|                    | (R) | TCCAGTTAGCCCTGCAATTC   |
| <i>MMP2</i>        | (F) | AGCTCCCGGAAAAGATTGAT   |
|                    | (R) | TCCAGTTAAAGGCAGCGTCT   |
| <i>MMP9</i>        | (F) | TTCAGAAGCAGCTGTCCCTG   |
|                    | (R) | AGTCATCGATCACGTCTCGC   |
| <i>MMP13</i>       | (F) | ACCCAGCCCTATCCCTTGAT   |
|                    | (R) | ACATGAGGTCTCGGGATGGA   |

|       |                                 |     |                       |
|-------|---------------------------------|-----|-----------------------|
|       | <i>Annexin A2</i>               | (F) | TCTGACTAACCGCAGCAATG  |
|       |                                 | (R) | TCAACAGGCCTAACATCACG  |
|       | <i>AGPAT1</i>                   | (F) | TGCTGCTCCACGTCAAATAC  |
|       |                                 | (R) | ACCTCCATCATTCCAAGCAG  |
|       | <i>AGPAT2</i>                   | (F) | TCAGCGGACAGAAGAAACTG  |
|       |                                 | (R) | TCCATGAGACCCATCATGTC  |
|       | <i><math>\beta</math>-actin</i> | (F) | CCCATCTATGAGGGTTACGC  |
|       |                                 | (R) | TTTAATGTCACGCACGATTTC |
| Human | <i>ICAM-1</i>                   | (F) | GGCTGGAGCTGTTTGAGAAC  |
|       |                                 | (R) | ACTGTGGGGTTCAACCTCTG  |
|       | <i>VCAM-1</i>                   | (F) | TAAAATGCCTGGGAAGATGG  |
|       |                                 | (R) | GGTGCTGCAAGTCAATGAGA  |
|       | <i>PECAM-1</i>                  | (F) | ATGATGCCCAGTTTGAGGTC  |
|       |                                 | (R) | ACGTCTTCAGTGGGGTTGTC  |
|       | <i>E-selectin</i>               | (F) | TGATGAGAGGTGCAGCAAGA  |
|       |                                 | (R) | GGATTCCAGGGCTGTACAGT  |
|       | <i>P-selectin</i>               | (F) | CGAGGACTGCGTGGAGATAT  |
|       |                                 | (R) | ACAGGAGCAGGTGTAGTTCC  |
|       | <i><math>\beta</math>-actin</i> | (F) | AGGCACTCTTCCAGCCTTCC  |
|       |                                 | (R) | GCACTGTGTTGGCGTACAGG  |

F: Forward, R: Reverse

**Supplementary Fig. S1. Akt activation with conditioned media or AM treatment in stressed cardiomyocytes *in vitro*.** (a) Western blot analysis of Akt activation in cardiomyocytes under hypoxia (1% O<sub>2</sub>) with the specified conditioned medium as in Fig.1a (1 – 5). (b) Akt activation was observed in cardiomyocytes treated with conditioned medium from either primary hepatocytes (labeled primary) or the Huh7 cell line. (c) The effects of Huh7-conditioned medium at room temperature or boiled at 100°C for 10 min on Akt activation in cardiomyocytes after 12 hrs of treatment. (d) UV traces of anion exchange chromatography (left) followed by gel filtration (right) during protein purification. A blue line in the chromatograms denotes the UV traces. The UV value of fraction 3 in gel filtration is approximately 10 mAU. Stimulation either with fraction A4, A5, or A6 in anion exchange chromatography activates Akt in cultured cardiomyocytes. Huh7-CM, Huh7-derived conditioned medium. (e) Akt activation is observed in cardiomyocytes after treatment with 10 µg/ml of AM, but not bikunin. (f) Gender differences in AM mRNA expression in the liver (left) and AM protein distribution in the LV (right) of 6-week-old wild type mice.

**Supplementary Fig. S2. AM protein distribution in mouse MI and AM serum concentration in acute MI patients.** (a) Differential AM protein (green) and granulocyte marker LY-6G (red) localization in the BZ at day 3 in mouse MI. Scale bar, 100 µm. (b) AM serum concentration in control subjects and acute MI patients.

**Supplementary Fig. S3. The effects of AM on mRNA expression and function in CFBs, MQs, and endothelial cells *in vitro*.** (a) αSMA mRNA expression in CFBs after AM administration with TGFβ1 stimulation. \*p < 0.05, compared to the negative control. (b) Changes in the mRNA expression of integrins (various alpha and beta subunits) and chemokine



receptors (CCR2, CCR5, CX3CR1) in J774 MQs. (c) Representative phase contrast images of AM-induced cell aggregation in J774 MQs after 24 hours. Scale bars, 100  $\mu$ m. (d) Changes in the mRNA expression of ICAM-1, iNOS, and IL-6 in bone marrow-derived macrophages with AM stimulation. \* $p < 0.05$ , compared to 0 hrs. (e) Changes in mRNA expression of cell adhesion-related genes (ICAM-1, VCAM-1, PECAM-1, E-selectin, P-selectin) in human umbilical vein endothelial cells. \* $p < 0.05$ , compared to 0 hrs. (f) Tube formation assay in human umbilical vein endothelial cells after AM stimulation (n = 4 per group).

**Supplementary Fig. S4. The effects of intramyocardial AM administration on cardiac**

**function in mouse MI.** (a) Retention period of native human AM protein injected into the BZ.

The representative bright field image under an optical microscope (MI day 1) and AM-immunostained images under an immunofluorescent microscope (day 2 and day 4) are shown.

The native AM protein is brown-colored as described previously. Scale bars, 500  $\mu$ m and 100  $\mu$ m (higher magnification). (b) Representative photographs of cardiac rupture at day 3 in the MI

+ AM group. The dotted line and arrow head indicate the IZ edge and rupture site, respectively.

(c) Echocardiographic parameters and heart weight to body weight ratio at 2 weeks post-treatment. \* $p < 0.05$ , compared to the sham group; \*\* $p < 0.05$ , compared to the MI + PBS group.

Body weight, BW; heart weight, HW.

**Supplementary Fig. S5. Screening of AM receptor.** (a) Immunoprecipitation of AM with

annexin A2 and vimentin. (b) Confirmation of siRNA or overexpression of annexin A2 in CFBs *in vitro*. CFBs were collected at 48 hrs after transfection. \* $p < 0.05$ , compared to the control. (c)

IL-1 $\beta$  mRNA expression in AM-stimulated CFBs after treatment with 5  $\mu$ g/ml of a blocking antibody, siRNA, or overexpression of annexin A2 for 8 hrs. \* $p < 0.05$ , compared to the negative

control. **(d)** Protein-lipid overlay assay using a sphingolipids strip. S1P, sphingosine-1-phosphate; SM, sphingomyelin; SPC, sphingosylphosphorylcholine; LPA, lysophosphatidic acid; GM1, monosialoganglioside; GD3, disialoganglioside; LPC, lysophosphocholine; PC, phosphatidylcholine. **(e)** Confirmation of AGPAT1 or AGPAT2 siRNA in CFBs. \* $p < 0.05$ , compared to the AM + control siRNA group. **(f and g)** Changes in IL-1 $\beta$  and MMP9 mRNA expression in AM-stimulated CFBs after treatment with AGPAT1 or AGPAT2 siRNA **(f)** and simultaneous AGPAT1 and AGPAT2 siRNAs **(g)**. \* $p < 0.05$ , compared to the negative control; \*\* $p < 0.05$ , compared to the AM + control siRNA group. In **(g)**, ctl, control; 1, AGPAT1; 2, AGPAT2; NS, not significant.

**Supplementary Fig. S6. The effects of short-term, systemic delivery of a selective DGK $\alpha$**

**inhibitor in mouse MI.** **(a and b)** Echocardiographic parameters **(a)**, systolic blood pressure, heart rate, and HW to BW ratio **(b)** at 2 and 4 weeks in the sham or MI groups treated with vehicle, low or high dose of CU-3. \* $p < 0.05$ , compared to the sham group; \*\* $p < 0.05$ , compared to the MI + vehicle group. **(c)** Survival curve of each treatment group. **(d)** Representative immunofluorescent images showing MMP9 protein expression (green) in the I + BZs at day 3. Scale bars, 60  $\mu\text{m}$ . **(e)** NF $\kappa$ B p65 activation (upper) and total MMP activity (lower) in the I + BZs at day 7 post-treatment analyzed by western blot and zymography, respectively.

# Supplementary Fig. S1

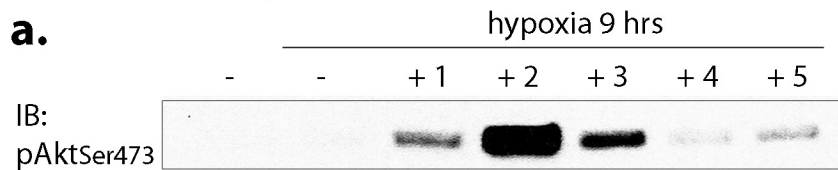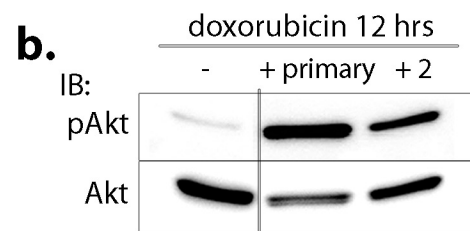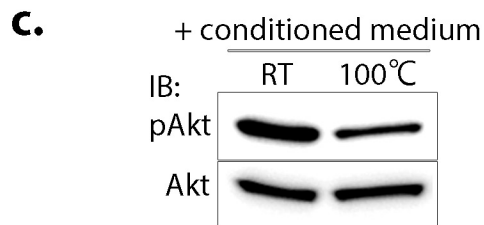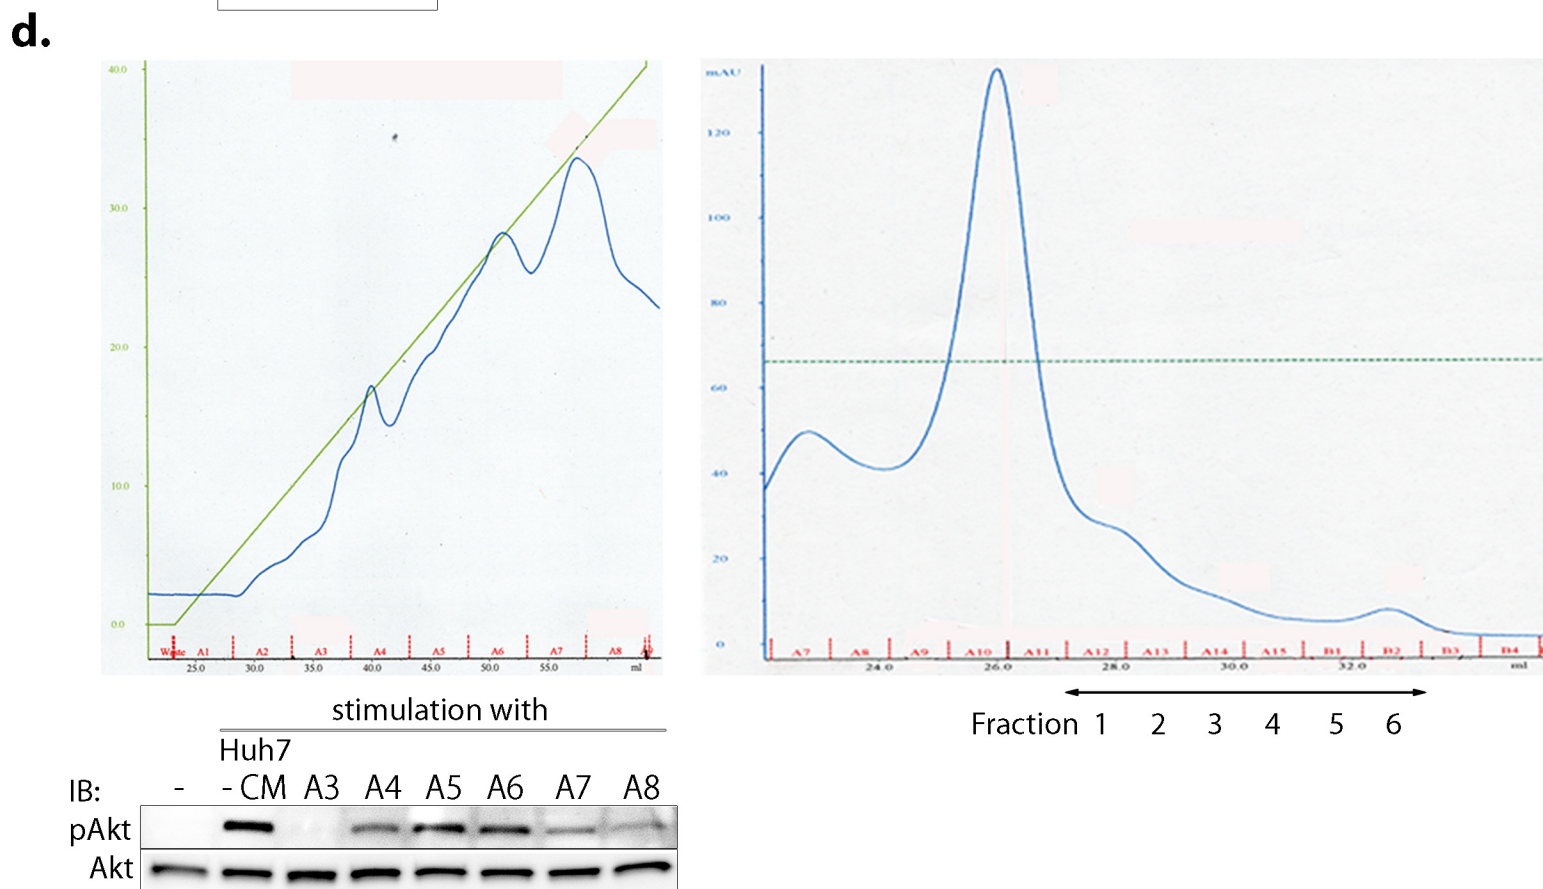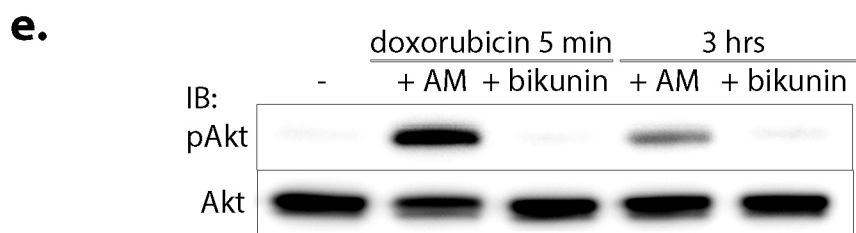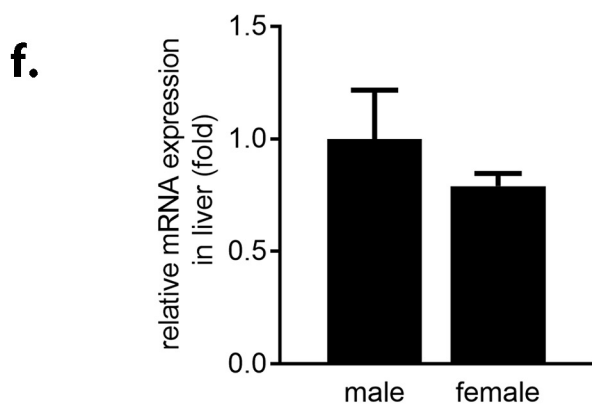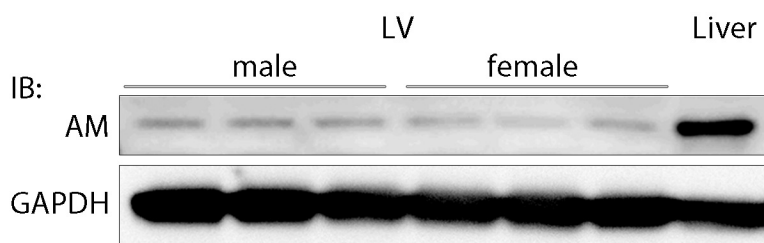

# Supplementary Fig. S2

**a.**

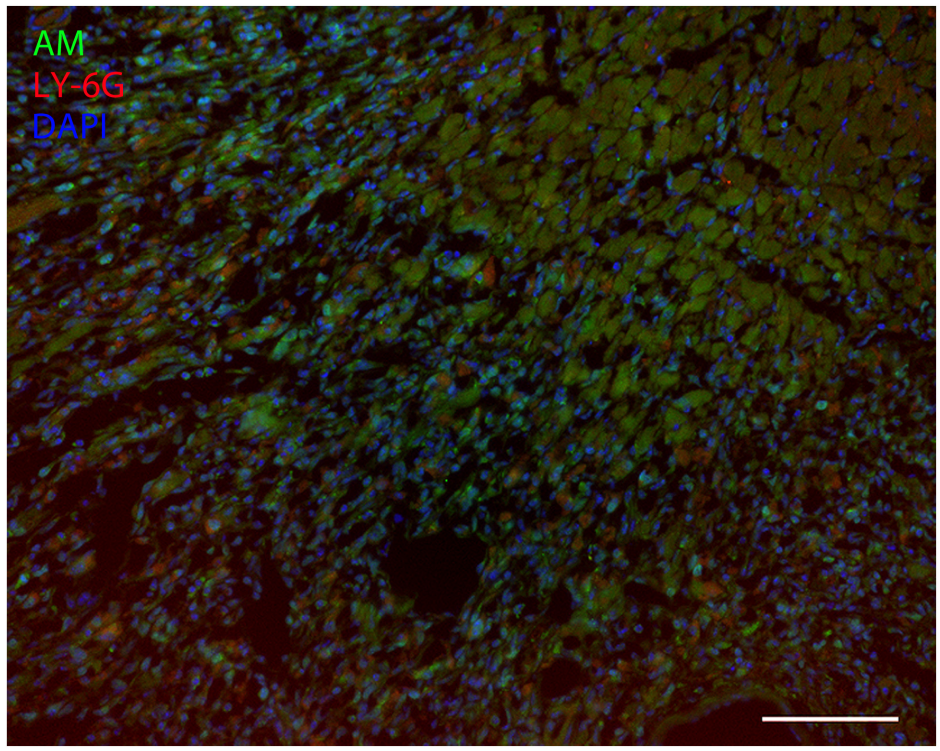

**b.**

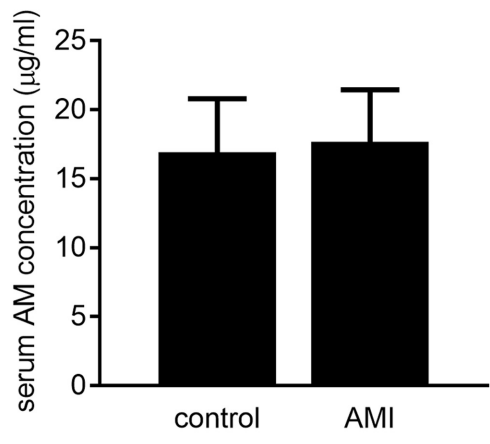

# Supplementary Fig. S3

## a. cardiac fibroblast

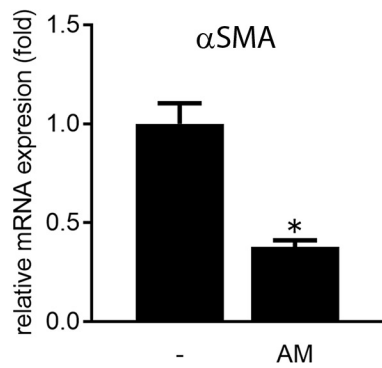

## b. J774 macrophage

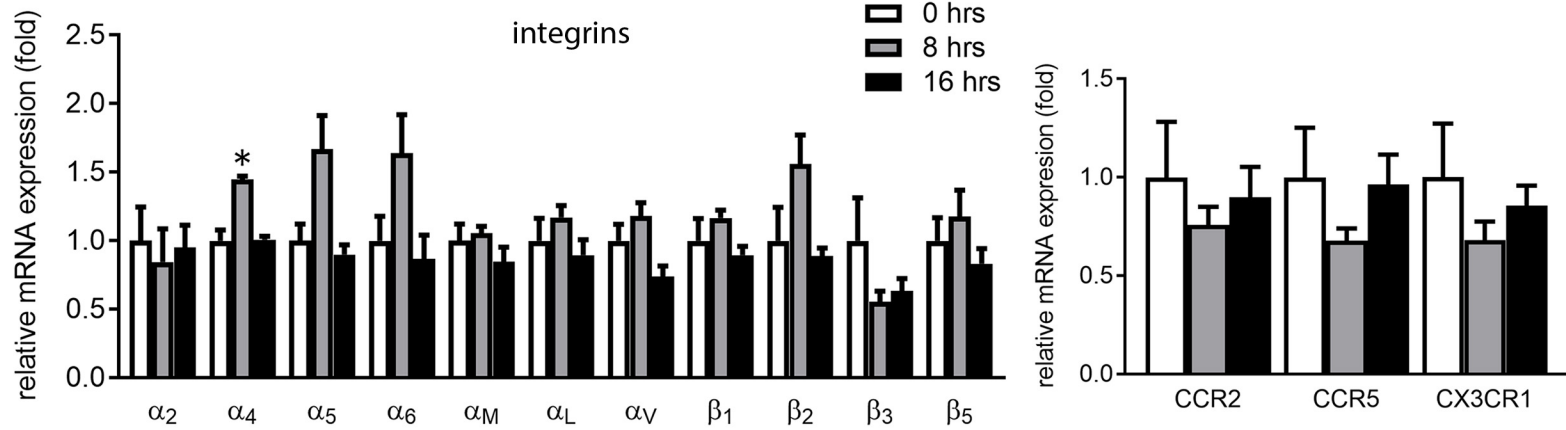

## c. J774 macrophage

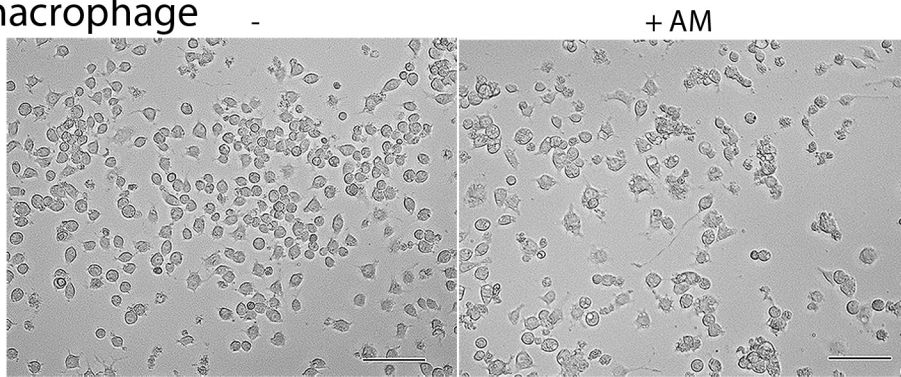

## d. bone marrow-derived macrophage

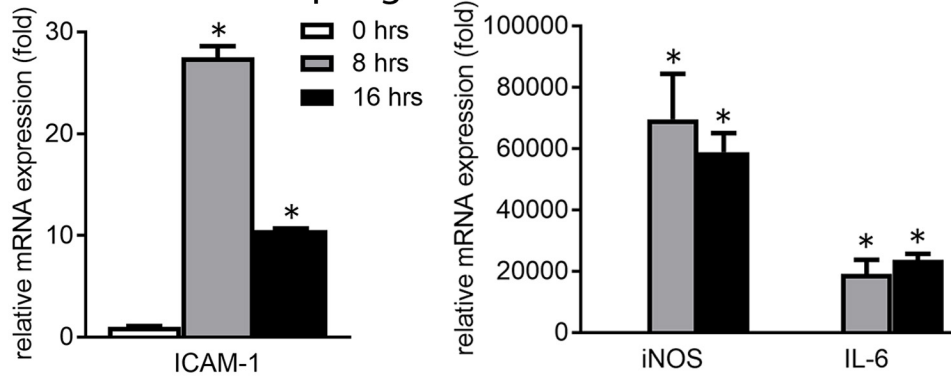

## e.

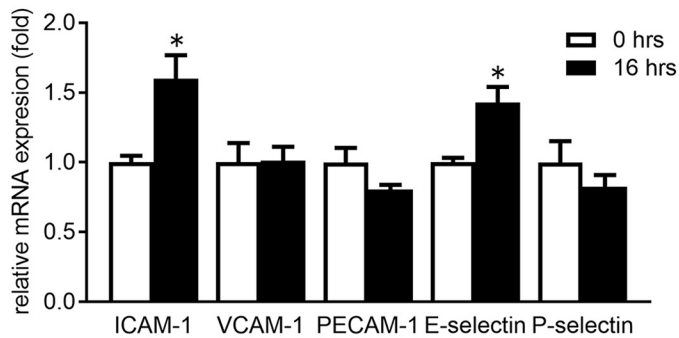

## f.

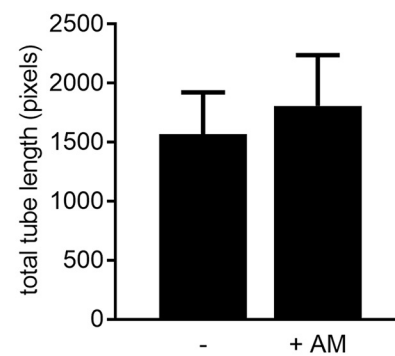

# Supplementary Fig. S4

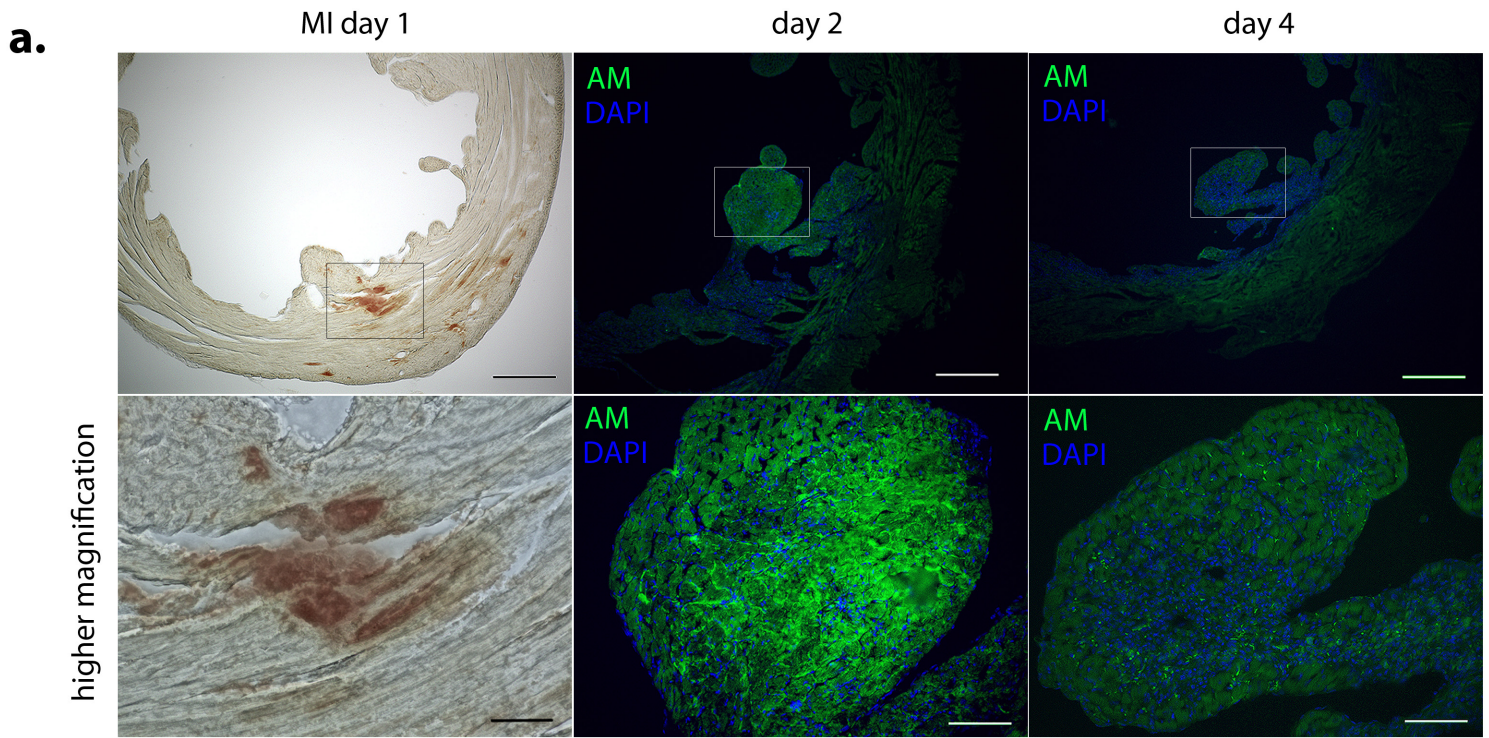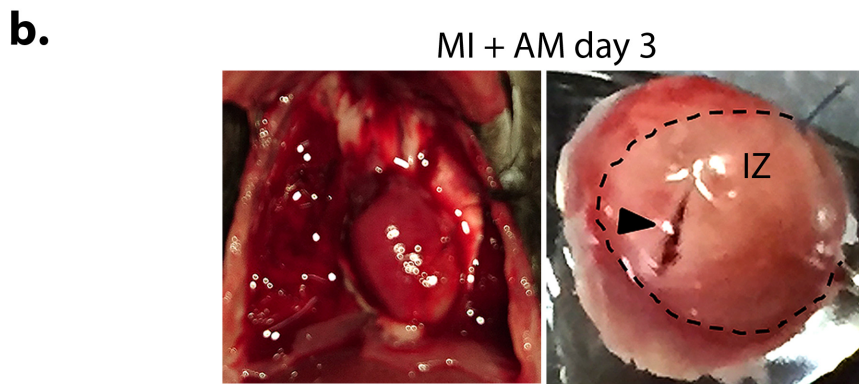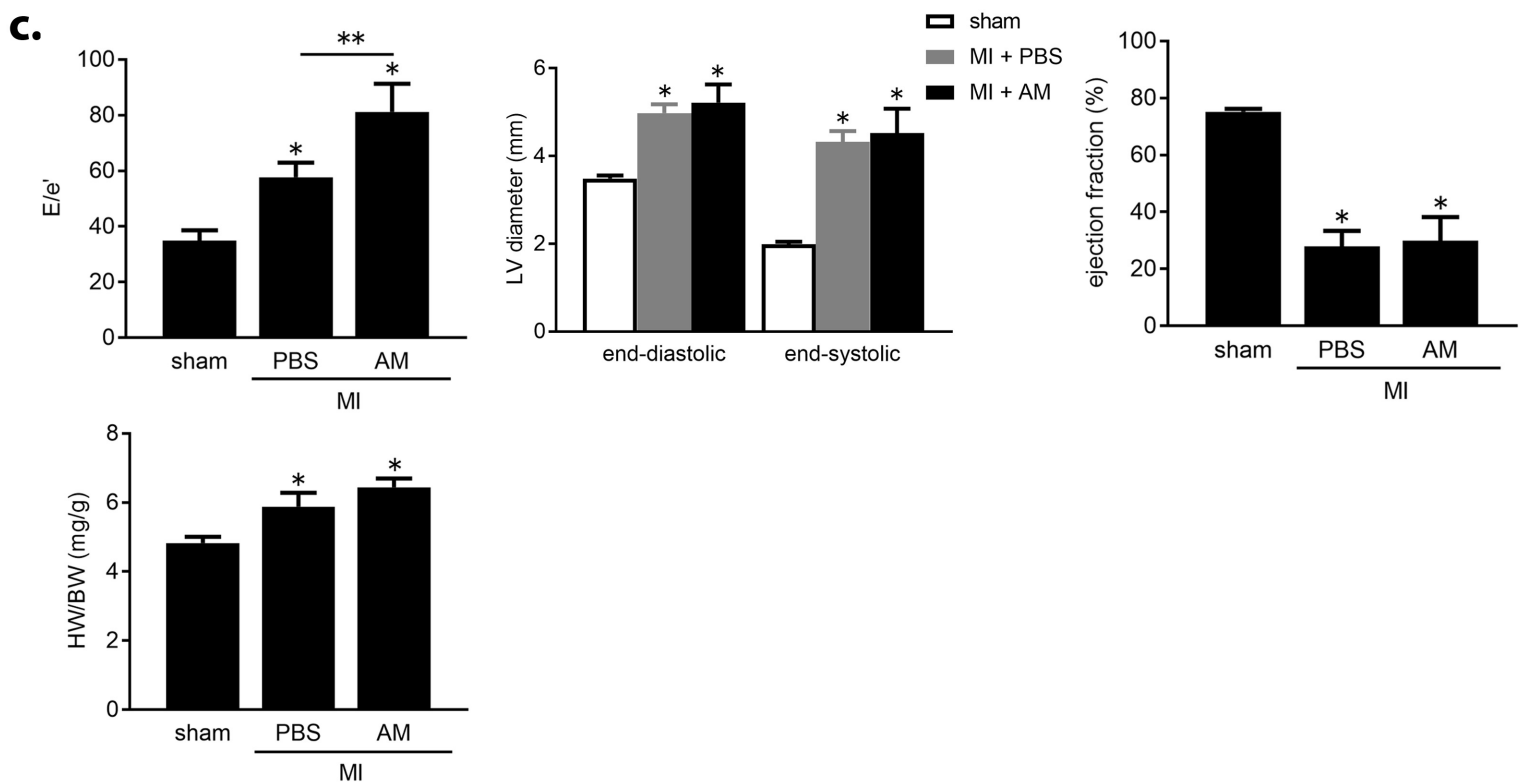

# Supplementary Fig. S5

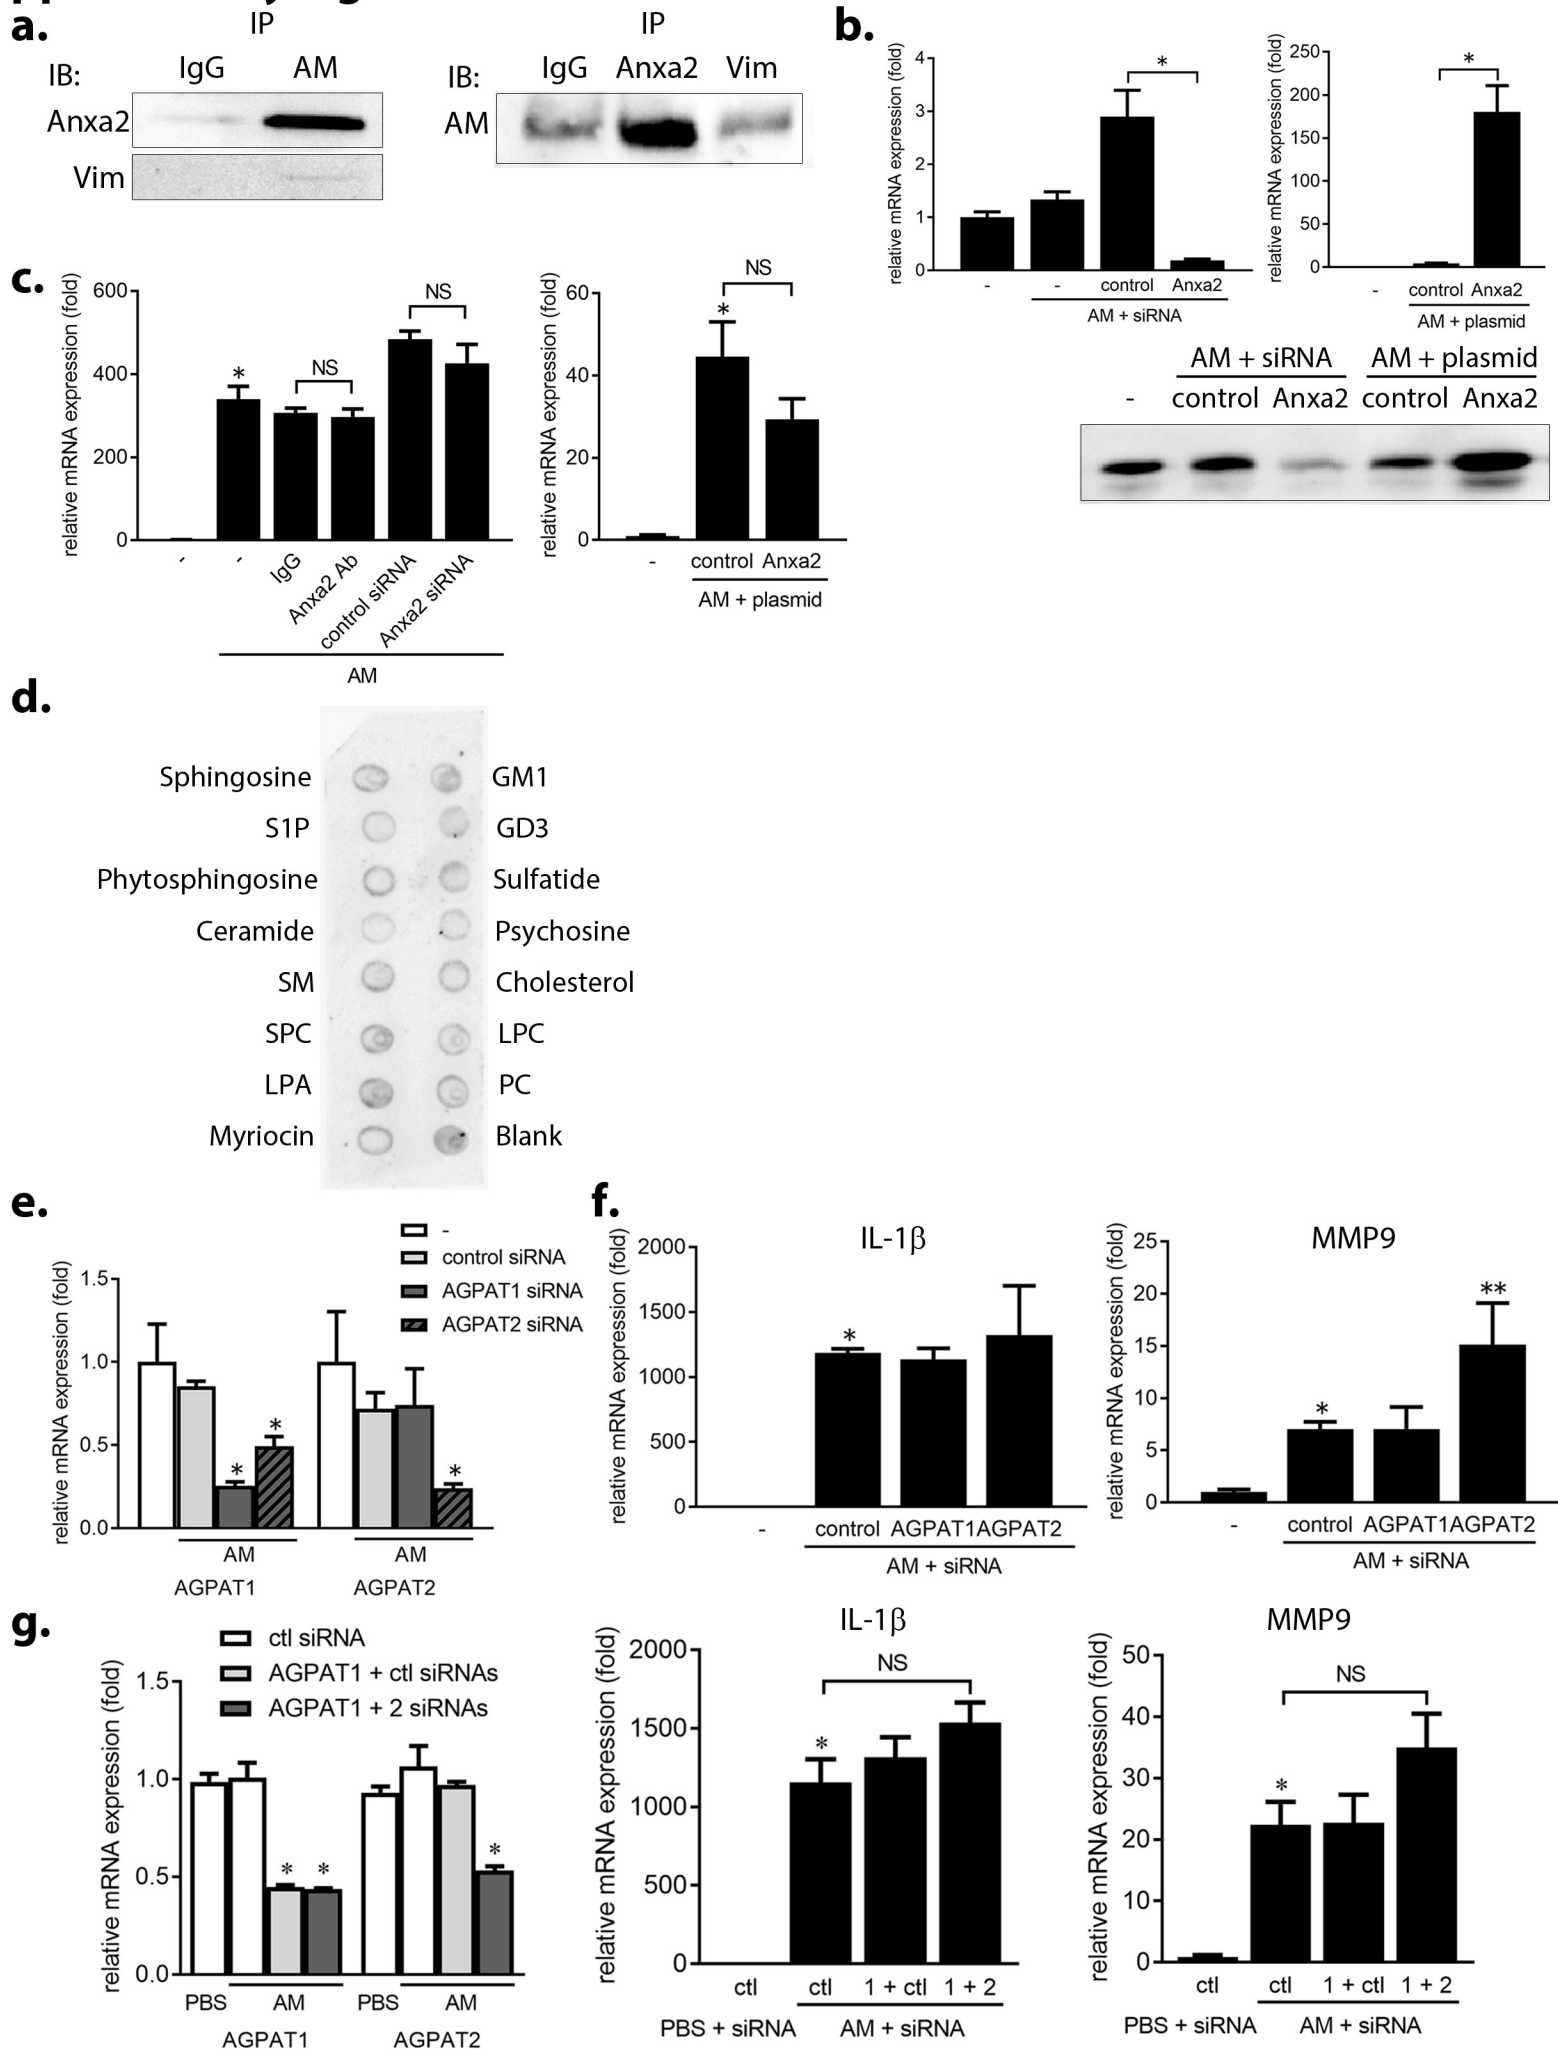

# Supplementary Fig. S6

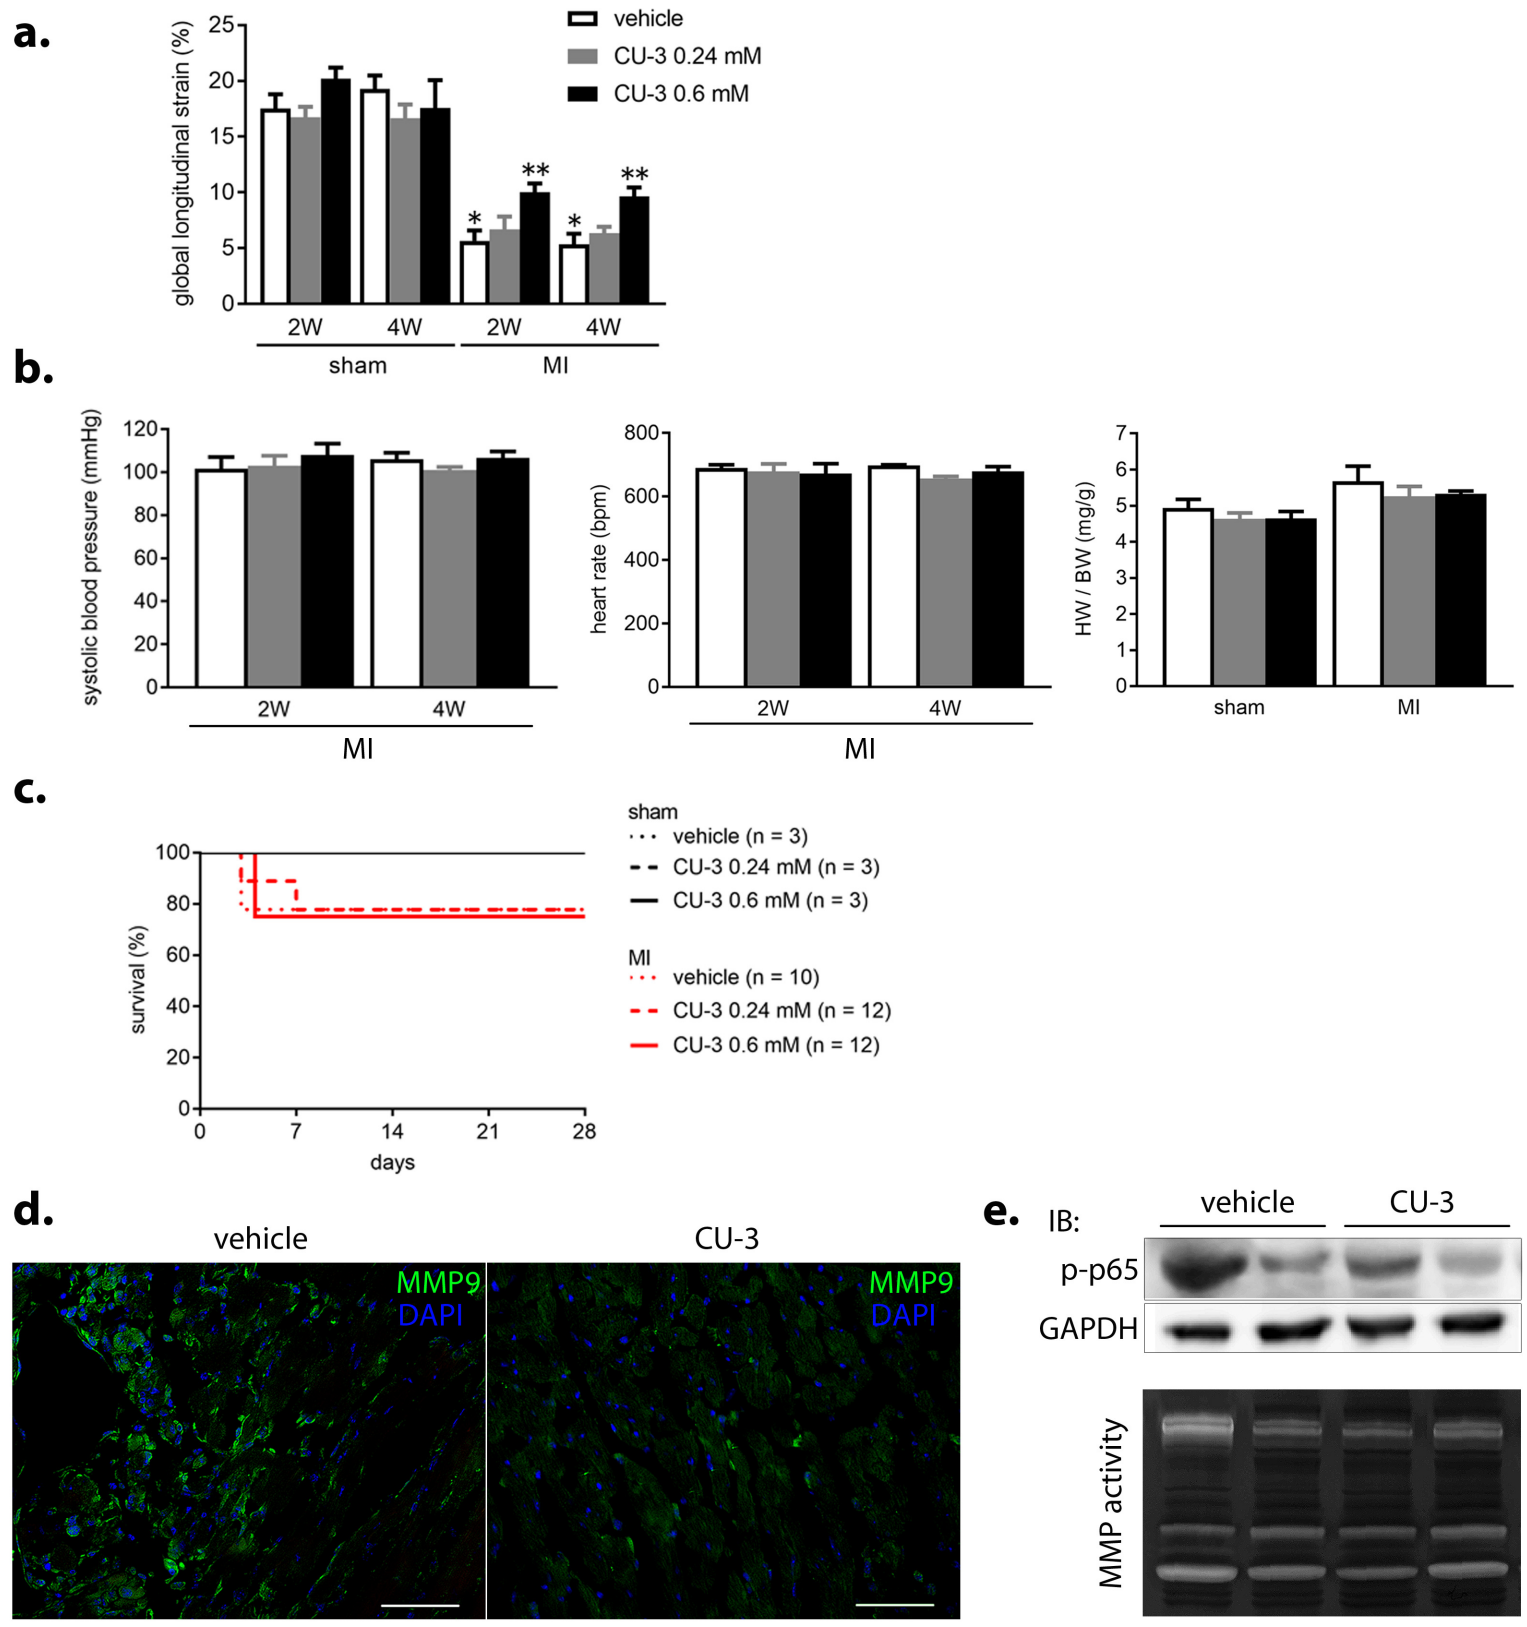

Supplement: 41598_2018_35194_MOESM1_ESM.pdf [file 41598_2018_35194_MOESM1_ESM.pdf]
